# Supplementary material
Source: PubMed Central journal article supplement (PMC6170778)

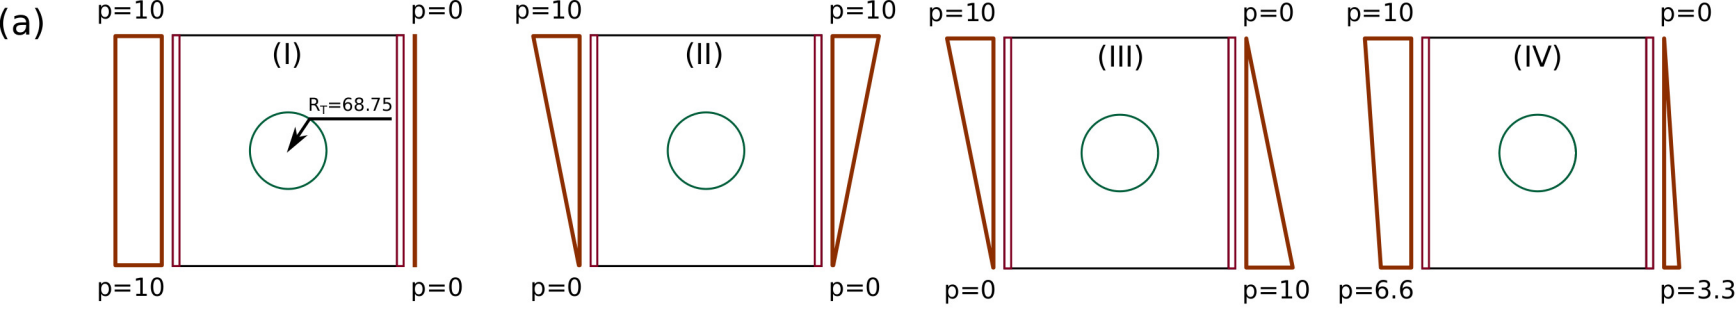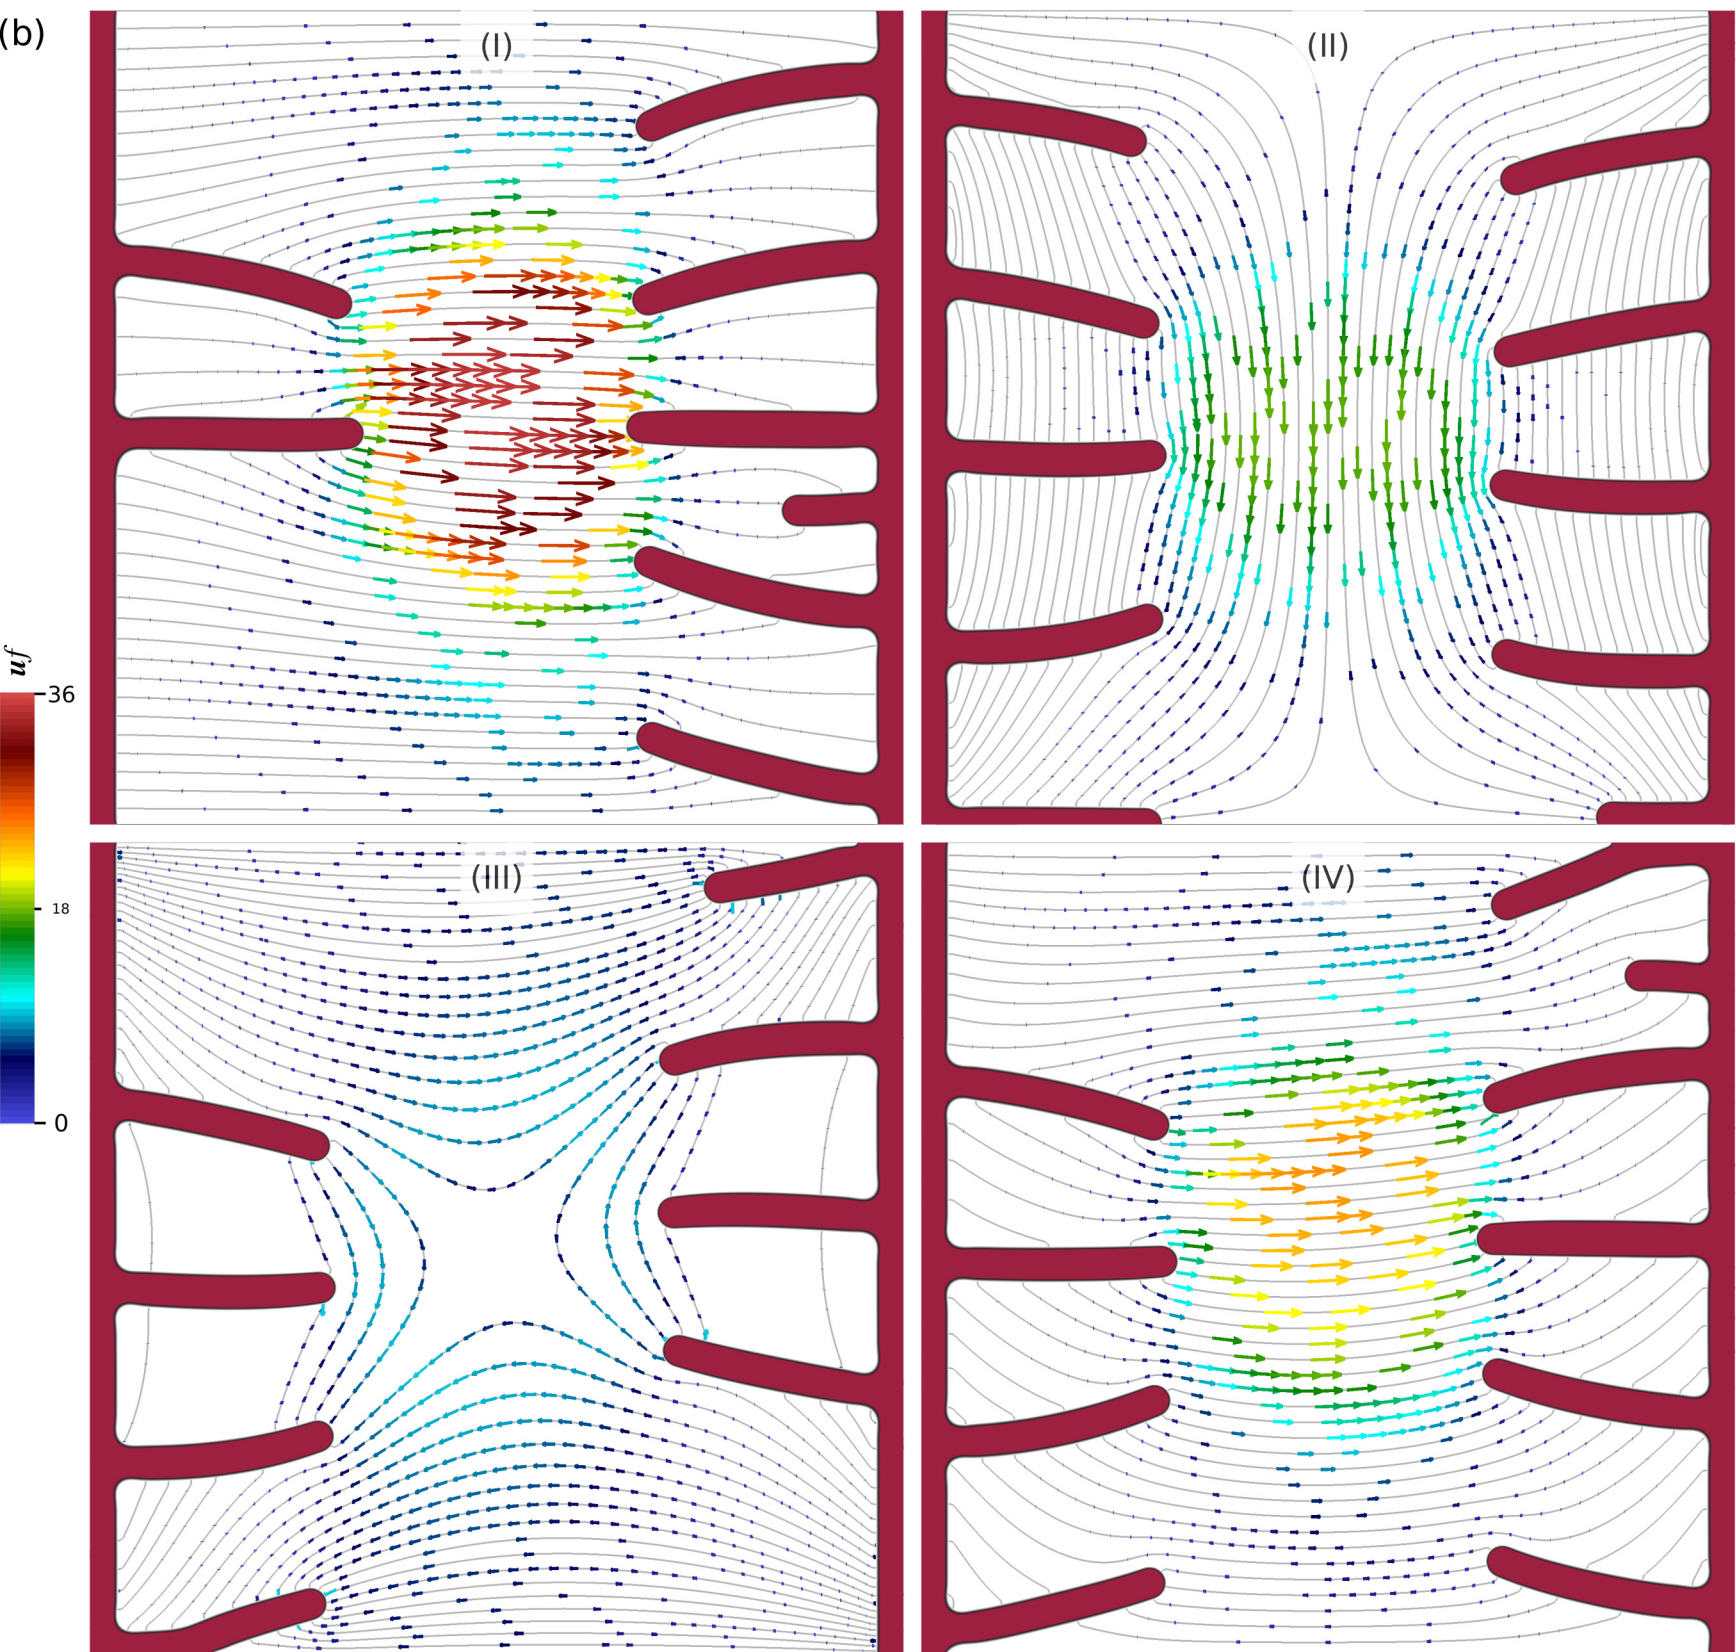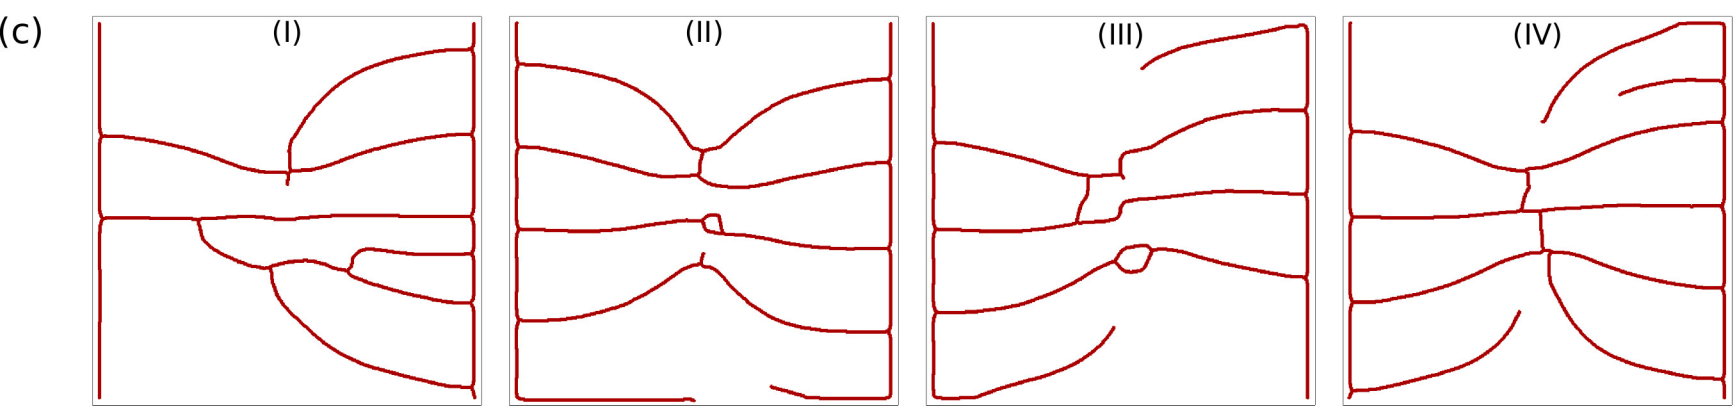

Supplement: rsif20180415supp2.pdf [file rsif20180415supp2.pdf]
